# Supplementary material for: Plasma phospholipid n-3 and n-6 polyunsaturated fatty acids in relation to cardiometabolic markers and gestational diabetes: A longitudinal study within the prospective NICHD Fetal Growth Studies
Source: PubMed Central journal article supplement (PMC6743768; doi:10.1371/journal.pmed.1002910), 2019-09-13

**S1 Fig.** Flow chart of the nested case-control study, within the NICHD Fetal Growth Studies-Singleton Cohort

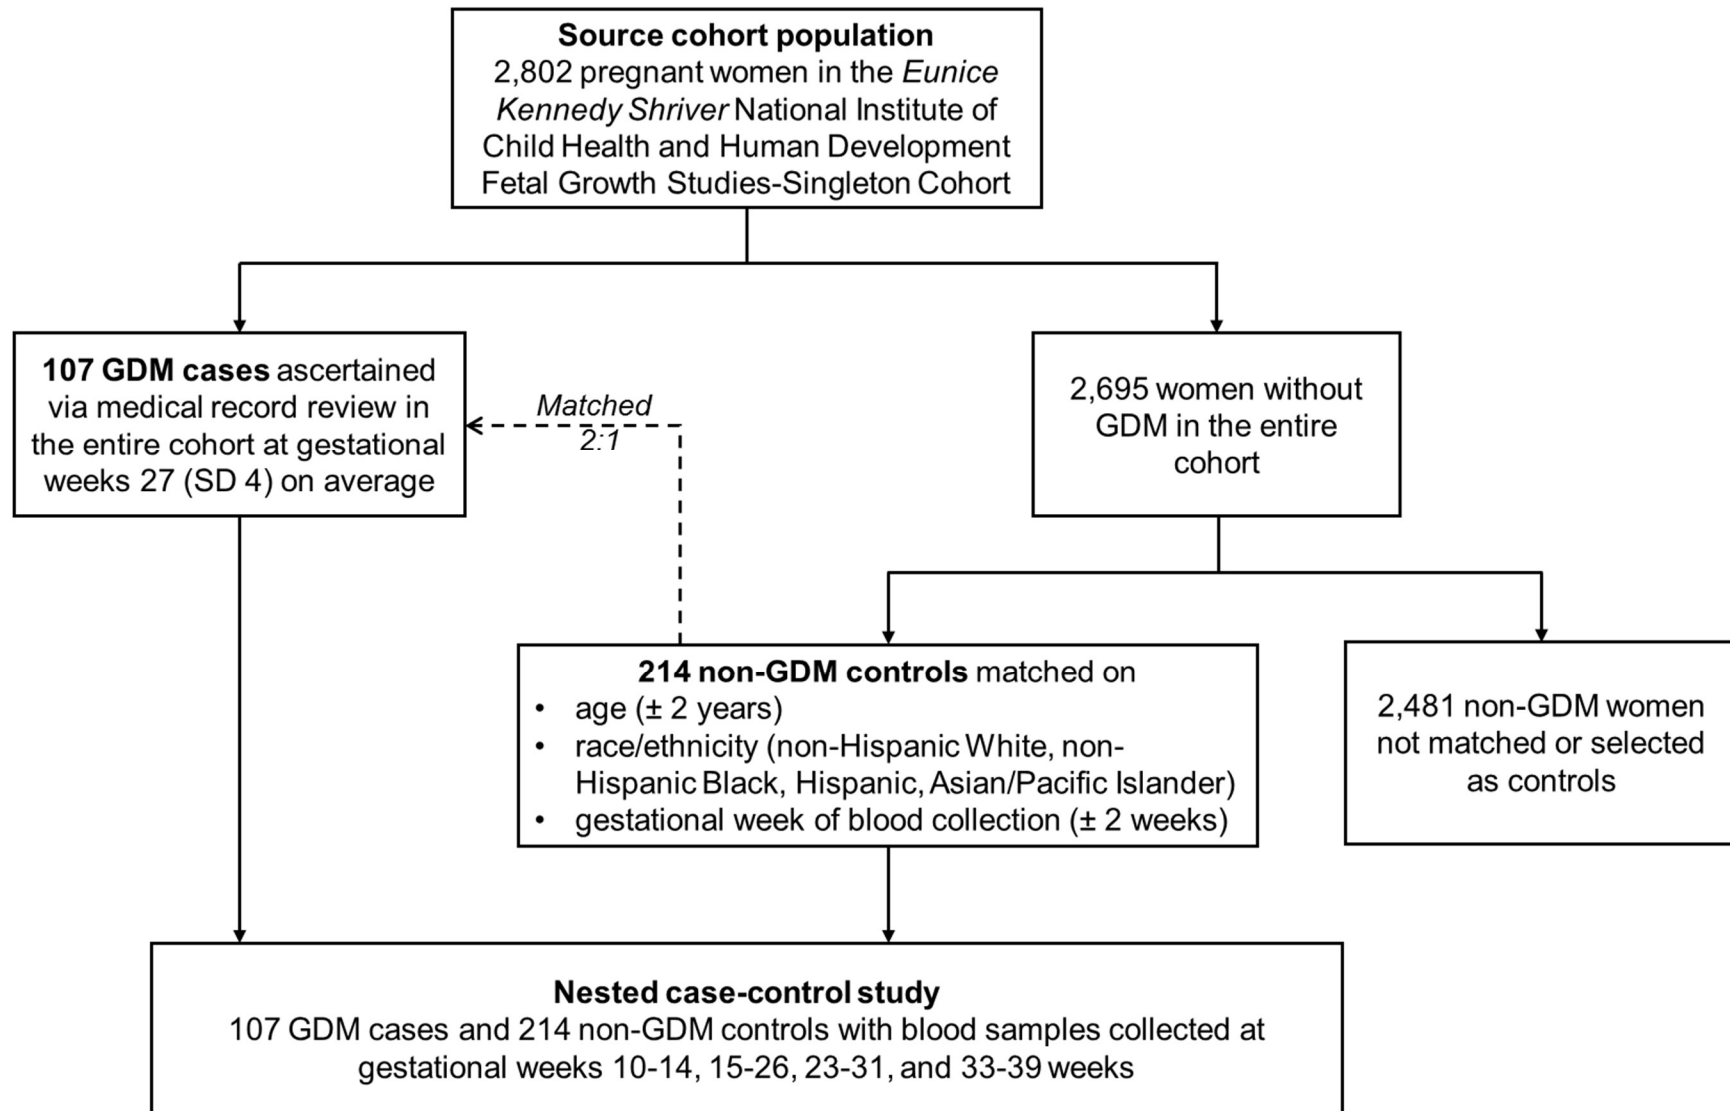

Supplement: pmed.1002910.s003.pdf [file pmed.1002910.s003.pdf]
