# Supplementary material for: Plasma phospholipid n-3 and n-6 polyunsaturated fatty acids in relation to cardiometabolic markers and gestational diabetes: A longitudinal study within the prospective NICHD Fetal Growth Studies
Source: PubMed Central journal article supplement (PMC6743768; doi:10.1371/journal.pmed.1002910), 2019-09-13

**S2 Fig. Metabolic pathways and major exogenous (dietary) and endogenous (lipogenesis) sources of polyunsaturated fatty acids.**

PUFA, polyunsaturated fatty acids. Fatty acid elongase and desaturase are denoted in grey squares. Sources of PUFAs are in *italics*.

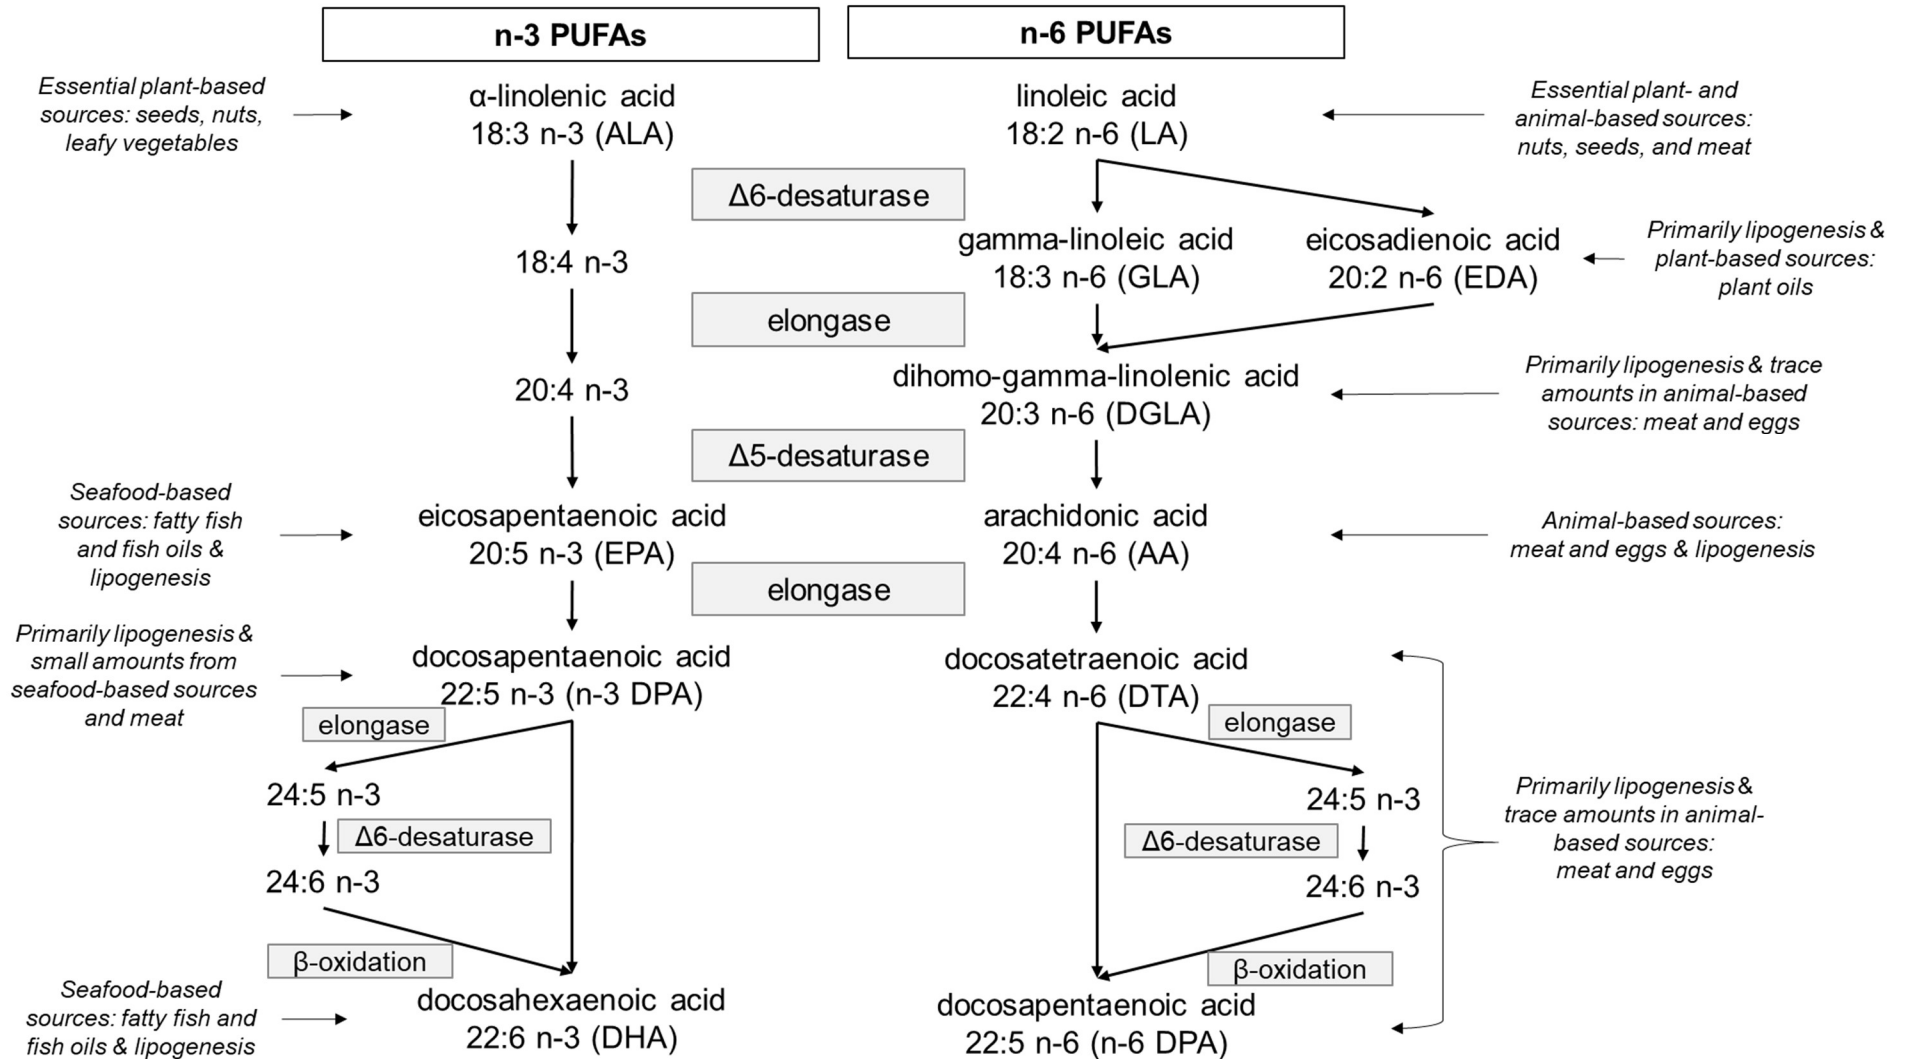

Supplement: pmed.1002910.s004.pdf [file pmed.1002910.s004.pdf]
