# Supplementary material for: Plasma phospholipid n-3 and n-6 polyunsaturated fatty acids in relation to cardiometabolic markers and gestational diabetes: A longitudinal study within the prospective NICHD Fetal Growth Studies
Source: PubMed Central journal article supplement (PMC6743768; doi:10.1371/journal.pmed.1002910), 2019-09-13
Supplement: pmed.1002910.s006.pdf [file pmed.1002910.s006.pdf]

**S4 Fig. Longitudinal profiles (mean  $\pm$  standard errors, %) of plasma phospholipid PUFA ratios throughout pregnancy according to gestational-age intervals among women with and without GDM.**

DGLA, dihomogamma-linolenic acid; LA, linoleic acid; PUFA, polyunsaturated fatty acid.

\* $P < 0.05$ ; \*\* $P < 0.01$ ; \*\*\* $P < 0.001$  for case-control comparisons obtained by linear mixed models with associated likelihood ratio tests accounting for matched case-control pairs at each gestational-age interval.

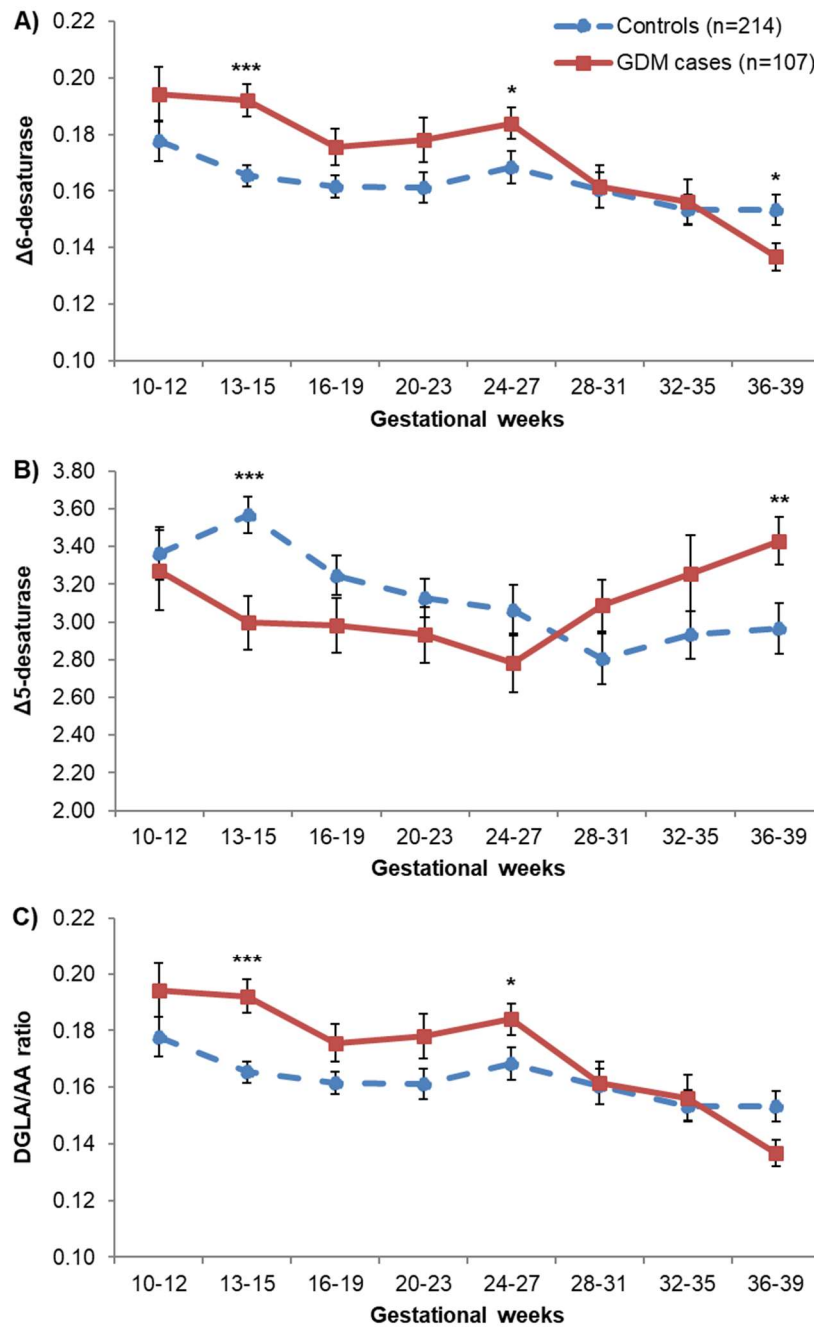

**Number of specimens**

|          |    |     |     |    |    |    |    |    |
|----------|----|-----|-----|----|----|----|----|----|
| Controls | 62 | 155 | 119 | 88 | 67 | 43 | 45 | 58 |
| Cases    | 32 | 76  | 55  | 43 | 56 | 45 | 38 | 51 |
