# Supplementary material for: Plasma phospholipid n-3 and n-6 polyunsaturated fatty acids in relation to cardiometabolic markers and gestational diabetes: A longitudinal study within the prospective NICHD Fetal Growth Studies
Source: PubMed Central journal article supplement (PMC6743768; doi:10.1371/journal.pmed.1002910), 2019-09-13
Supplement: pmed.1002910.s010.pdf [file pmed.1002910.s010.pdf]

**S1 Table. Sensitivity analyses for the association of plasma phospholipid n-3 PUFA, n-6 PUFA, and PUFA ratios at gestational weeks 10-14 and 15-26 with GDM risk**

|                                             | Gestational weeks 10-14 |                      | Gestational weeks 15-26 |                      |
|---------------------------------------------|-------------------------|----------------------|-------------------------|----------------------|
|                                             | Model 2 <sup>1</sup>    | Model 3 <sup>2</sup> | Model 2 <sup>1</sup>    | Model 3 <sup>2</sup> |
| <b>n-3 PUFAs</b>                            |                         |                      |                         |                      |
| 18:3n-3 (alpha-linolenic acid, ALA)         | 1.24 (0.93, 1.65)       | 1.32 (0.98, 1.79)    | 1.10 (0.82, 1.46)       | 1.13 (0.84, 1.52)    |
| 20:5n-3 (eicosapentaenoic acid, EPA)        | 0.83 (0.58, 1.20)       | 0.76 (0.52, 1.12)    | 0.94 (0.72, 1.23)       | 0.97 (0.73, 1.28)    |
| 22:5n-3 (docosapentaenoic acid, DPA)        | 0.94 (0.69, 1.27)       | 0.77 (0.55, 1.08)    | 0.67 (0.45, 0.99)       | 0.68 (0.46, 1.01)    |
| 22:6n-3 (docosahexaenoic acid, DHA)         | 0.86 (0.62, 1.20)       | 0.82 (0.58, 1.16)    | 0.68 (0.45, 1.03)       | 0.68 (0.45, 1.05)    |
| Total n-3 PUFAs                             | 0.85 (0.61, 1.19)       | 0.78 (0.55, 1.12)    | 0.64 (0.42, 0.96)       | 0.65 (0.42, 0.99)    |
| <b>n-6 PUFAs</b>                            |                         |                      |                         |                      |
| 18:2n-6 (linoleic acid, LA)                 | 0.88 (0.68, 1.14)       | 1.24 (0.90, 1.72)    | 1.01 (0.75, 1.35)       | 1.08 (0.78, 1.48)    |
| 18:3n-6 (gamma-linoleic acid, GLA)          | 1.40 (1.05, 1.87)*      | 1.32 (1.01, 1.65)    | 0.92 (0.66, 1.29)       | 0.88 (0.63, 1.25)    |
| 20:2n-6 (eicosadienoic acid, EDA)           | 0.80 (0.59, 1.08)       | 0.94 (0.68, 1.30)    | 0.75 (0.55, 1.03)       | 0.76 (0.55, 1.05)    |
| 20:3n-6 (dihomo-gamma-linolenic acid, DGLA) | 1.95 (1.37, 2.78)**     | 1.81 (1.25, 2.62)*   | 1.72 (1.22, 2.43)*      | 1.67 (1.17, 2.38)*   |
| 20:4n-6 (arachidonic acid, AA)              | 0.94 (0.71, 1.25)       | 0.90 (0.67, 1.22)    | 1.06 (0.77, 1.46)       | 1.07 (0.77, 1.48)    |
| 22:4n-6 (docosatetraenoic acid, DTA)        | 0.88 (0.61, 1.28)       | 0.82 (0.56, 1.20)    | 0.55 (0.37, 0.83)*      | 0.57 (0.38, 0.87)*   |
| 22:5n-6 (docosapentaenoic acid, n6-DPA)     | 0.98 (0.71, 1.36)       | 0.94 (0.66, 1.32)    | 1.31 (0.93, 1.85)       | 1.40 (1.04, 1.88)    |
| Total n-6 PUFAs                             | 0.95 (0.71, 1.29)       | 1.68 (1.09, 2.59)    | 1.30 (0.93, 1.83)       | 1.65 (1.08, 2.51)    |
| <b>PUFA ratios</b>                          |                         |                      |                         |                      |
| Δ6-Desaturase, 18:3n-6/18:2n-6              | 1.36 (1.03, 1.79)*      | 1.11 (0.82, 1.50)    | 0.95 (0.68, 1.32)       | 0.89 (0.63, 1.25)    |
| Δ5-Desaturase, 20:4n-6/20:3n-6              | 0.65 (0.47, 0.90)*      | 0.67 (0.48, 0.94)    | 0.66 (0.45, 0.97)*      | 0.68 (0.46, 0.98)    |
| DGLA/LA, 20:3n-6/18:2n-6                    | 1.71 (1.26, 2.33)**     | 1.43 (1.01, 2.01)    | 1.51 (1.10, 2.06)*      | 1.46 (1.06, 2.02)    |

PUFA, polyunsaturated fatty acid. Values in the table are odds ratio (95% CI).

<sup>1</sup>The risk estimates were adjusted for age (years), gestational age at blood collection (weeks), parity (nulliparous, multiparous), family history of diabetes (yes, no), and pre-pregnancy body mass index (<25.0, 25.0-29.9, 30.0-34.9, 35.0-44.9 kg/m<sup>2</sup>).

<sup>2</sup>Additionally adjusted for plasma phospholipid saturated fatty acids.

\*, \*\*P value <0.05, 0.01, after false discovery rate correction, respectively.
