# Supplementary material for: Plasma phospholipid n-3 and n-6 polyunsaturated fatty acids in relation to cardiometabolic markers and gestational diabetes: A longitudinal study within the prospective NICHD Fetal Growth Studies
Source: PubMed Central journal article supplement (PMC6743768; doi:10.1371/journal.pmed.1002910), 2019-09-13
Supplement: pmed.1002910.s011.pdf [file pmed.1002910.s011.pdf]

**S2 Table. Odds ratios (95% CIs) for subsequent risk of GDM according to quartiles of plasma phospholipid n-3 PUFA, n-6 PUFA, and PUFA ratios at gestational weeks 10-14 and 15-26<sup>1</sup>**

|                                      | Gestational weeks 10-14 |                            | Gestational weeks 15-26 |                            |
|--------------------------------------|-------------------------|----------------------------|-------------------------|----------------------------|
|                                      | Crude                   | Multivariable <sup>1</sup> | Crude                   | Multivariable <sup>1</sup> |
| <b>n-3 PUFAs</b>                     |                         |                            |                         |                            |
| 18:3n-3 (alpha-linolenic acid, ALA)  |                         |                            |                         |                            |
| Q1                                   | Reference               | Reference                  | Reference               | Reference                  |
| Q2                                   | 1.32 (0.66, 2.63)       | 1.79 (0.79, 4.05)          | 0.59 (0.29, 1.20)       | 0.78 (0.34, 1.79)          |
| Q3                                   | 1.38 (0.69, 2.78)       | 1.74 (0.79, 3.84)          | 1.23 (0.63, 2.44)       | 1.77 (0.79, 3.94)          |
| Q4                                   | 1.30 (0.65, 2.60)       | 1.86 (0.83, 4.13)          | 0.76 (0.38, 1.55)       | 1.12 (0.48, 2.60)          |
| <i>P</i> -for-trend <sup>2</sup>     | 0.609                   | 0.493                      | 0.700                   | 0.542                      |
| 20:5n-3 (eicosapentaenoic acid, EPA) |                         |                            |                         |                            |
| Q1                                   | Reference               | Reference                  | Reference               | Reference                  |
| Q2                                   | 0.47 (0.21, 1.06)       | 0.56 (0.24, 1.31)          | 0.57 (0.28, 1.16)       | 0.60 (0.27, 1.37)          |
| Q3                                   | 0.55 (0.23, 1.34)       | 0.62 (0.24, 1.59)          | 0.78 (0.39, 1.56)       | 0.70 (0.30, 1.61)          |
| Q4                                   | 0.82 (0.34, 1.99)       | 0.83 (0.32, 2.16)          | 0.42 (0.18, 0.98)       | 0.49 (0.19, 1.26)          |
| <i>P</i> -for-trend <sup>2</sup>     | 0.998                   | 0.852                      | 0.117                   | 0.275                      |
| 22:5n-3 (docosapentaenoic acid, DPA) |                         |                            |                         |                            |
| Q1                                   | Reference               | Reference                  | Reference               | Reference                  |
| Q2                                   | 1.10 (0.55, 2.20)       | 0.92 (0.41, 2.03)          | 0.71 (0.34, 1.46)       | 0.72 (0.31, 1.68)          |
| Q3                                   | 0.67 (0.31, 1.44)       | 0.53 (0.22, 1.28)          | 0.63 (0.30, 1.33)       | 0.79 (0.34, 1.82)          |
| Q4                                   | 0.81 (0.38, 1.75)       | 1.13 (0.46, 2.79)          | 0.28 (0.11, 0.72)       | 0.29 (0.10, 0.85)          |
| <i>P</i> -for-trend <sup>2</sup>     | 0.597                   | 0.852                      | 0.035                   | 0.120                      |
| 22:6n-3 (docosahexaenoic acid, DHA)  |                         |                            |                         |                            |
| Q1                                   | Reference               | Reference                  | Reference               | Reference                  |
| Q2                                   | 0.66 (0.32, 1.35)       | 0.90 (0.42, 1.93)          | 0.82 (0.41, 1.63)       | 0.95 (0.43, 2.09)          |
| Q3                                   | 0.79 (0.41, 1.54)       | 0.93 (0.44, 1.94)          | 0.46 (0.21, 1.03)       | 0.52 (0.20, 1.32)          |
| Q4                                   | 0.43 (0.20, 0.96)       | 0.63 (0.25, 1.56)          | 0.61 (0.27, 1.39)       | 0.69 (0.25, 1.93)          |
| <i>P</i> -for-trend <sup>2</sup>     | 0.230                   | 0.672                      | 0.170                   | 0.406                      |
| Total n-3 PUFAs                      |                         |                            |                         |                            |
| Q1                                   | Reference               | Reference                  | Reference               | Reference                  |
| Q2                                   | 0.85 (0.43, 1.67)       | 1.03 (0.49, 2.17)          | 0.77 (0.39, 1.50)       | 0.83 (0.38, 1.79)          |
| Q3                                   | 0.56 (0.26, 1.20)       | 0.77 (0.31, 1.87)          | 0.49 (0.21, 1.13)       | 0.55 (0.20, 1.55)          |
| Q4                                   | 0.57 (0.28, 1.15)       | 0.59 (0.26, 1.32)          | 0.36 (0.15, 0.83)       | 0.36 (0.14, 0.98)          |
| <i>P</i> -for-trend <sup>2</sup>     | 0.230                   | 0.493                      | 0.035                   | 0.120                      |
| <b>n-6 PUFAs</b>                     |                         |                            |                         |                            |
| 18:2n-6 (linoleic acid, LA)          |                         |                            |                         |                            |
| Q1                                   | Reference               | Reference                  | Reference               | Reference                  |
| Q2                                   | 0.80 (0.41, 1.56)       | 0.79 (0.36, 1.71)          | 0.82 (0.42, 1.60)       | 0.87 (0.41, 1.85)          |
| Q3                                   | 1.01 (0.54, 1.90)       | 1.03 (0.50, 2.12)          | 0.78 (0.39, 1.55)       | 0.89 (0.40, 1.97)          |
| Q4                                   | 0.68 (0.35, 1.31)       | 0.58 (0.27, 1.26)          | 0.91 (0.47, 1.79)       | 0.93 (0.41, 2.10)          |
| <i>P</i> -for-trend <sup>2</sup>     | 0.483                   | 0.321                      | 0.936                   | 0.884                      |
| 18:3n-6 (gamma-linoleic acid, GLA)   |                         |                            |                         |                            |
| Q1                                   | Reference               | Reference                  | Reference               | Reference                  |
| Q2                                   | 1.40 (0.65, 3.01)       | 1.23 (0.52, 2.89)          | 1.25 (0.61, 2.55)       | 0.98 (0.45, 2.18)          |
| Q3                                   | 2.12 (1.03, 4.36)       | 1.36 (0.61, 3.06)          | 1.27 (0.64, 2.50)       | 1.03 (0.47, 2.27)          |
| Q4                                   | 2.63 (1.26, 5.49)       | 2.53 (1.12, 5.68)          | 0.89 (0.41, 1.91)       | 0.90 (0.37, 2.18)          |
| <i>P</i> -for-trend <sup>2</sup>     | 0.020                   | 0.068                      | 0.936                   | 0.884                      |
| 20:2n-6 (eicosadienoic acid, EDA)    |                         |                            |                         |                            |
| Q1                                   | Reference               | Reference                  | Reference               | Reference                  |

|                                             |                   |                          |                   |                   |
|---------------------------------------------|-------------------|--------------------------|-------------------|-------------------|
| Q2                                          | 0.48 (0.24, 0.95) | 0.61 (0.29, 1.28)        | 0.80 (0.40, 1.60) | 0.91 (0.40, 2.06) |
| Q3                                          | 0.58 (0.29, 1.16) | 0.65 (0.30, 1.38)        | 0.48 (0.23, 1.01) | 0.58 (0.25, 1.32) |
| Q4                                          | 0.49 (0.23, 1.03) | 0.53 (0.24, 1.18)        | 0.49 (0.23, 1.05) | 0.62 (0.26, 1.49) |
| <i>P</i> -for-trend <sup>2</sup>            | 0.275             | 0.312                    | 0.109             | 0.416             |
| 20:3n-6 (dihomo-gamma-linolenic acid, DGLA) |                   |                          |                   |                   |
| Q1                                          | Reference         | Reference                | Reference         | Reference         |
| Q2                                          | 1.79 (0.83, 3.89) | 1.59 (0.67, 3.75)        | 1.73 (0.64, 4.63) | 1.67 (0.56, 4.92) |
| Q3                                          | 2.03 (0.89, 4.59) | 2.36 (0.97, 5.75)        | 4.27 (1.64, 11.2) | 3.76 (1.28, 11.1) |
| Q4                                          | 3.98 (1.77, 8.93) | 3.42 (1.37, 8.54)        | 5.53 (2.07, 14.8) | 5.12 (1.70, 15.4) |
| <i>P</i> -for-trend <sup>2</sup>            | 0.008             | 0.056                    | 0.001             | 0.008             |
| 20:4n-6 (arachidonic acid, AA)              |                   |                          |                   |                   |
| Q1                                          | Reference         | Reference                | Reference         | Reference         |
| Q2                                          | 0.74 (0.40, 1.38) | 0.61 (0.30, 1.25)        | 0.71 (0.35, 1.43) | 0.72 (0.31, 1.66) |
| Q3                                          | 0.52 (0.25, 1.09) | 0.43 (0.18, 1.04)        | 0.76 (0.35, 1.62) | 0.83 (0.34, 2.03) |
| Q4                                          | 0.70 (0.36, 1.39) | 0.63 (0.30, 1.32)        | 1.06 (0.51, 2.23) | 1.04 (0.45, 2.43) |
| <i>P</i> -for-trend <sup>2</sup>            | 0.325             | 0.312                    | 0.939             | 0.884             |
| 22:4n-6 (docosatetraenoic acid, DTA)        |                   |                          |                   |                   |
| Q1                                          | Reference         | Reference                | Reference         | Reference         |
| Q2                                          | 0.57 (0.26, 1.24) | 0.72 (0.31, 1.68)        | 0.56 (0.29, 1.08) | 0.76 (0.35, 1.65) |
| Q3                                          | 0.43 (0.18, 1.02) | 0.44 (0.16, 1.20)        | 0.46 (0.21, 0.98) | 0.47 (0.20, 1.13) |
| Q4                                          | 0.56 (0.22, 1.40) | 0.56 (0.20, 1.59)        | 0.22 (0.09, 0.56) | 0.30 (0.11, 0.83) |
| <i>P</i> -for-trend <sup>2</sup>            | 0.294             | 0.321                    | 0.004             | 0.060             |
| 22:5n-6 (docosapentaenoic acid, n6-DPA)     |                   |                          |                   |                   |
| Q1                                          | Reference         | Reference                | Reference         | Reference         |
| Q2                                          | 2.29 (1.11, 4.72) | 2.41 (1.04, 5.58)        | 1.23 (0.57, 2.65) | 1.40 (0.57, 3.44) |
| Q3                                          | 1.53 (0.73, 3.24) | 2.11 (0.89, 5.03)        | 1.41 (0.66, 2.99) | 2.16 (0.87, 5.33) |
| Q4                                          | 1.46 (0.62, 3.41) | 1.61 (0.62, 4.14)        | 1.77 (0.78, 4.00) | 2.39 (0.93, 6.15) |
| <i>P</i> -for-trend <sup>2</sup>            | 0.483             | 0.321                    | 0.322             | 0.128             |
| Total n-6 PUFAs                             |                   |                          |                   |                   |
| Q1                                          | Reference         | Reference                | Reference         | Reference         |
| Q2                                          | 0.77 (0.39, 1.52) | 0.51 (0.23, 1.1 = 0.603) | 1.25 (0.58, 2.68) | 1.32 (0.55, 3.19) |
| Q3                                          | 0.97 (0.47, 2.02) | 0.77 (0.32, 1.85)        | 0.97 (0.45, 2.09) | 0.91 (0.38, 2.19) |
| Q4                                          | 0.91 (0.44, 1.86) | 0.67 (0.29, 1.55)        | 1.48 (0.67, 3.26) | 1.79 (0.69, 4.61) |
| <i>P</i> -for-trend <sup>2</sup>            | 0.894             | 0.460                    | 0.757             | 0.624             |
| <b>PUFA ratios</b>                          |                   |                          |                   |                   |
| $\Delta$ 6-Desaturase, 18:3n-6/18:2n-6      |                   |                          |                   |                   |
| Q1                                          | Reference         | Reference                | Reference         | Reference         |
| Q2                                          | 1.21 (0.58, 2.54) | 0.88 (0.38, 2.02)        | 2.06 (1.00, 4.23) | 2.32 (0.97, 5.52) |
| Q3                                          | 1.49 (0.73, 3.07) | 0.93 (0.42, 2.09)        | 1.65 (0.79, 3.43) | 1.49 (0.64, 3.49) |
| Q4                                          | 2.03 (1.01, 4.08) | 1.86 (0.86, 4.03)        | 0.95 (0.42, 2.18) | 1.01 (0.39, 2.60) |
| <i>P</i> -for-trend <sup>2</sup>            | 0.047             | 0.114                    | 0.810             | 0.775             |
| $\Delta$ 5-Desaturase, 20:4n-6/20:3n-6      |                   |                          |                   |                   |
| Q1                                          | Reference         | Reference                | Reference         | Reference         |
| Q2                                          | 0.86 (0.47, 1.57) | 1.08 (0.53, 2.18)        | 0.62 (0.30, 1.25) | 0.69 (0.31, 1.55) |
| Q3                                          | 0.41 (0.20, 0.87) | 0.45 (0.19, 1.05)        | 0.83 (0.42, 1.64) | 0.92 (0.42, 1.98) |
| Q4                                          | 0.37 (0.17, 0.81) | 0.35 (0.14, 0.84)        | 0.27 (0.11, 0.68) | 0.22 (0.07, 0.67) |
| <i>P</i> -for-trend <sup>2</sup>            | 0.015             | 0.030                    | 0.048             | 0.078             |
| DGLA/LA, 20:3n-6/18:2n-6                    |                   |                          |                   |                   |

|                                  | Reference         | Reference         | Reference         | Reference         |
|----------------------------------|-------------------|-------------------|-------------------|-------------------|
| Q1                               |                   |                   |                   |                   |
| Q2                               | 3.18 (1.36, 7.45) | 3.67 (1.45, 9.28) | 1.93 (0.73, 5.13) | 1.83 (0.60, 5.53) |
| Q3                               | 2.17 (0.92, 5.12) | 2.10 (0.83, 5.36) | 3.01 (1.16, 7.83) | 2.24 (0.72, 6.97) |
| Q4                               | 5.80 (2.40, 14.0) | 5.89 (2.25, 15.4) | 4.72 (1.85, 12.1) | 4.35 (1.47, 12.8) |
| <i>P</i> -for-trend <sup>2</sup> | 0.076             | 0.221             | 0.726             | 0.752             |

PUFA, polyunsaturated fatty acid; Q, quartile.

<sup>1</sup>Adjusted for age (years), gestational age at blood collection (weeks), parity (nulliparous, multiparous), family history of diabetes (yes, no), and pre-pregnancy body mass index (<25.0, 25.0-29.9, 30.0-34.9, 35.0-44.9 kg/m<sup>2</sup>).

<sup>2</sup>*P*-for-trend was corrected using the false discovery rate method.
